# Supplementary material
Source: ML conference proceedings conference paper supplement (https://openaccess.thecvf.com/content/CVPR2023/html/Meunier_Unsupervised_Space-Time_Network_CVPR_2023_paper.html)
Supplement: Supplementary file 1 [file Meunier_Unsupervised_Space-Time_Network_CVPR_2023_supplemental.pdf]

## Supplementary material

# Unsupervised space-time network for temporally-consistent segmentation of multiple motions

Etienne Meunier  
Inria, Rennes, France  
etienne.meunier@inria.fr

Patrick Bouthemy  
Inria, Rennes, France  
patrick.bouthemy@inria.fr

### 1. Linking predictions and segments selection

We detail the procedure for linking predictions in a subsequence and for selecting optimal segments for evaluation. Subsequences are composed of  $T + 1$  consecutive flow fields. Let us define:

$$\check{m}_t(i) = \arg \max_{k=1, \dots, K} m_k(i, t), \quad (1)$$

where  $m_k(i, t)$  is the probability of site  $i$  to belong to segment  $k$  at time  $t$ . Let  $\check{m}_t$  be the segmentation map at time  $t$  encompassing the (up to)  $K$  segments predicted by the network,  $\check{m}_t = \{\check{m}_t(i), i \in \mathcal{I}\}$ . In other words,  $\check{m}_t$  is the label array representing the set of segments extracted at time  $t$ , segments being (non necessary connected) layers. We will also use the term mask to designate  $\check{m}_t$ , when no confusion can occur. The prediction of the network is given for a triplet of input flow fields  $(f_{t-1}; f_t; f_{t+1})$  as a triplet of masks  $(\check{m}_{t-1}; \check{m}_t; \check{m}_{t+1})$  for  $\tau = 1$ . All those triplet predictions are produced in parallel and the triplet output are independent as illustrated in Fig.1.

#### 1.1. Linking predictions

The masks in the same triplet are sharing common labels but not necessary across triplets. By label, we mean mask number. We have to link the labels by finding correspondences between triplets. Since we have three versions of the same mask  $\check{m}_t$ , it is straightforward to achieve it.

First, we need to introduce an additional notation  $\check{m}_t^{t'}$  as defined below. The segmentation mask  $\check{m}_t^{t'}$  ( $t' \in \{t-1, t, t+1\}$ ) of width  $W$  and height  $H$ , consisting of  $K$  non-overlapping classes ( $\check{m}_t^{t'} \in \{1, \dots, K\}^{W \times H}$ ) and corresponding to flow  $f_t$ , is the one predicted by the network when it takes a triplet centered around  $t'$  as input. We have to find the best label association between instances  $\check{m}_t^{t'}$  of the same mask. To do that, we compute a label reassignment table that will be applied to the two masks  $\check{m}_t^t$  and

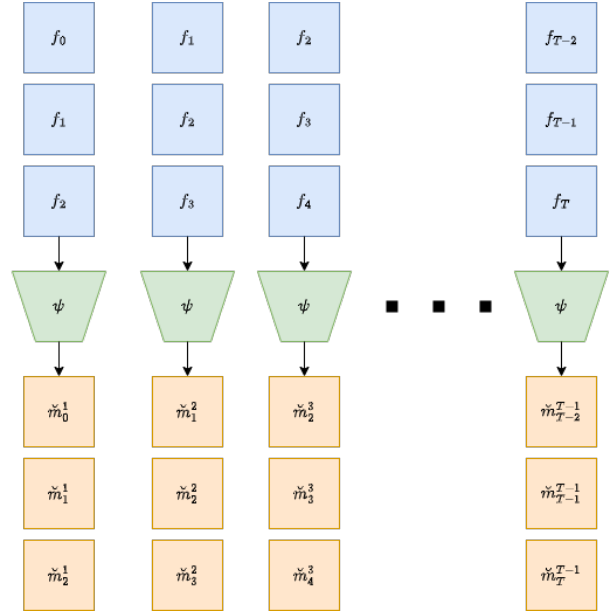

Figure 1. Output of the network by triplet (for  $\tau = 1$ ) within a subsequence covering the time interval  $[0, T]$ . The lower index  $t$  of each mask  $\check{m}_t^{t'}$  represents the time instant of the corresponding flow field  $f_t$ , and the upper one  $t'$  corresponds to the time instant when it is produced, that is, the one of the reference (central) flow field of the triplet. Segmentation masks with the same lower index correspond to different segmentation instances of the same flow field.

$\check{m}_{t-1}^t$ . The reassigned label  $l^*$  for each label  $l \in \{1, \dots, K\}$  is given by:

$$l^* = \arg \max_{k \in \{1, \dots, K\}} J(k_t^{t-1}, l_t^t) + J(k_{t-1}^{t-1}, l_{t-1}^t), \quad (2)$$

where  $J$  is the IoU score between two segments. The binary

array  $k_t^{t'}$  is defined as follows:

$$k_t^{t'}(i) = \begin{cases} 1 & \text{if } \check{m}_t^{t'}(i) = k \\ 0 & \text{otherwise} \end{cases} \quad (3)$$

$l_t^{t'}$  is defined in a similar way. We proceed by pairs, since two consecutive triplets share two masks as illustrated in Fig.2 (the pairs of arrows). Starting from  $t = 0$ , we propagate the labels to the whole subsequence using the criterion of eq.(2). After the label reassignment propagation, we rename each  $\check{m}_t^{t'}$  as  $\bar{m}_t^{t'}$ .

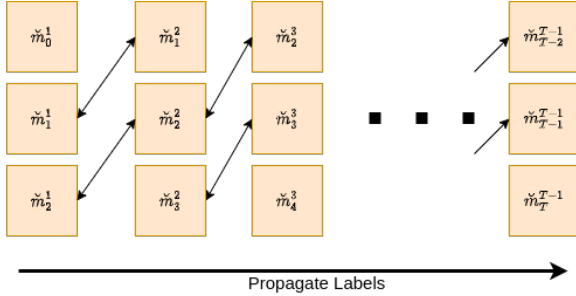

Figure 2. Propagation of the labels (i.e., masks numbers) over the subsequence.

## 1.2. Select optimal labels

We select an optimal set of segments for evaluation, based on the ground truth, for the entire subsequence. The goal is to show that, since we have coherent labels within the subsequence, we can select the optimal segments at the subsequence level. First, we unroll our sequence by only keeping the central prediction for each step from  $t = 1$  to  $t = T - 1$ , and just retrieving the single instance produced for the first ( $t = 0$ ) and last ( $t = T$ ) time steps as depicted in Fig.3.

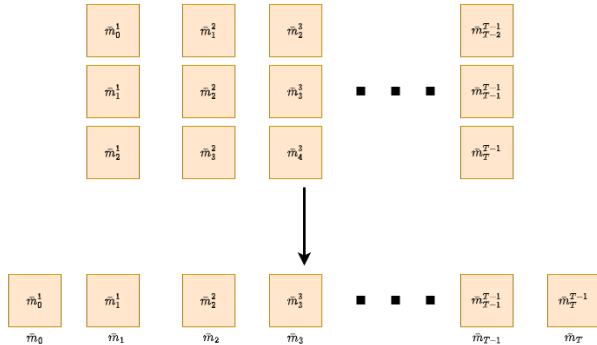

Figure 3. Formation of the mask series  $\{\bar{m}_t, t = 0, \dots, T\}$  over the subsequence for evaluation, once the label propagation step is achieved.

Then, for the entire subsequence, we select the subset  $S^*$  of labels (that is, of segments) to constitute the predicted

foreground, using the binary ground-truth  $g_t$ . The selected label subset  $S^*$  is given by:

$$S^* = \arg \max_{S \subset \mathcal{P}(\{1, \dots, K\})} \sum_{t=0}^T J(\bigcup_{l \in S} \bar{l}_t, g_t), \quad (4)$$

where  $\mathcal{P}(\{1, \dots, K\})$  is the partition of the labels in the subsequence, and the binary masks  $\bar{l}_t$  correspond to the label mask  $\bar{m}_t$ . Once we have selected the subset  $S^*$  of labels, we can use it to build our binary segmentation  $\{s_t, t = 0, \dots, T\}$  on the whole subsequence for evaluation, as illustrated in Fig.5.

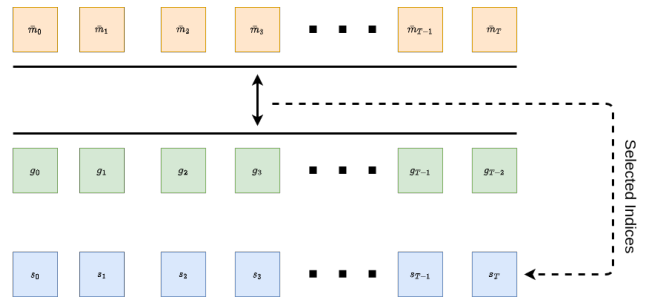

Figure 4. Comparison of the selected segments with the ground truth for evaluation.

## 2. Impact of subsequence length

In the temporal segment linkage and the segment selection process described above, we take into account a subsequence of length  $T + 1$ . For the results reported in the main paper, we used a subsequence length of 10 frames. However, we can vary the subsequence length to evaluate the robustness of our method to this parameter. All the evaluations regarding the impact of the subsequence length, are produced from the same trained network and initial segmentation. They are plotted in Fig.5. Longer subsequences are more challenging since they require a stronger temporal consistency. Also, they can be more impacted by occlusions or flow estimation errors, which can break label propagation.

We can see that our method is robust to the choice of the subsequence length, and that it is performing well on long subsequences as well.

## 3. Additional experiments

### 3.1. Training without data augmentation

To extend our ablation study, we have also carried out the evaluation of the case when our network is trained without any data augmentation. Results are collected in Table 1. Clearly, as expected, the data augmentation improves performance.

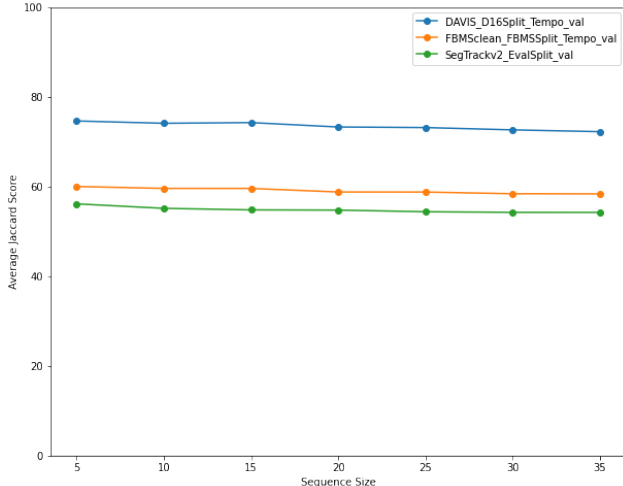

Figure 5. Evaluation of our temporal segment linkage and segment selection process for different subsequence lengths on the three datasets.

| Data Augmentation | Davis Val | SegTrackV2 | FBMS |
|-------------------|-----------|------------|------|
| With              | 73.2      | 55.0       | 59.4 |
| Without           | 70.1      | 52.3       | 50.4 |

Table 1. Impact of the data augmentation. Scores (Jaccard index) obtained on the three datasets.

### 3.2. Impact of the temporal interval $\tau$

Regarding the  $\tau$  parameter (i.e., the temporal interval between the flows of the input triplet), we trained our network with the full configuration and randomly sampled  $\tau$  values at training time. Let us remind that the flow  $f_{t-\tau}$  (respectively,  $f_{t+\tau}$ ) is computed between image frames at time instants  $t-\tau$  and  $t-\tau+1$  (respectively,  $t+\tau$  and  $t+\tau+1$ ). We uniformly sample  $\tau$  among a set of values during training. At inference, we still use only  $\tau = 1$  for the sake of efficiency. Thus, this experiment could also be perceived as a type of data augmentation.

| $\tau$ while training | Davis Val | SegTrackV2 | FBMS |
|-----------------------|-----------|------------|------|
| {1}                   | 73.2      | 55.0       | 59.4 |
| {1,2,3,4,5,9,10,12}   | 73.0      | 54.3       | 57.9 |

Table 2. Impact of the use, at training time, of different values for the time interval  $\tau$  in the input flow triplet. Scores (Jaccard index) obtained on the three datasets.

As we can observe in Table 2, it has no sensible impact on results (even a slight performance decrease). In future work, we plan to investigate the combination of different  $\tau$  values, including negative values, at test time.

### 3.3. Results on Davis2017-motion

In addition to the datasets (DAVIS2016, FBMS59, SegTrackV2), we have evaluated our method on the DAVIS2017-motion dataset. We added this experiment in the supplementary material since DAVIS2017-motion was released on Nov.12, 2022, after the initial submission of our paper. DAVIS2017 [1] is an extension of DAVIS2016 dataset that includes additional videos with multi-object contents, resulting in multiple-segment annotations for the ground truth. It contains a total of 90 videos, split into 60 for training and 30 for validation. DAVIS2017-motion is a curated version of the DAVIS2017 dataset performed by the authors of [2] for a fair evaluation of motion segmentation based on flow information only, where connected objects sharing common motion are merged in the ground truth of the validation test.

| Method / Scores | $\mathcal{J}\&\mathcal{F} \uparrow$ | $\mathcal{J} \uparrow$ | $\mathcal{F} \uparrow$ |
|-----------------|-------------------------------------|------------------------|------------------------|
| Ours            | 42.0                                | 38.8                   | 45.2                   |
| MoSeg           | 35.8                                | 38.4                   | 33.2                   |
| OCLR            | 55.1                                | 54.5                   | 55.7                   |

Table 3. Comparative evaluation on the DAVIS2017-motion validation set. The Jaccard index  $\mathcal{J}$  expresses the correct overlap (intersection over union) between the extracted segments and the ground truth, while  $\mathcal{F}$  focuses on segment boundary accuracy (the higher the better).  $\mathcal{J}\&\mathcal{F}$  is the mean of the two. Evaluation is performed on the video as a whole, and reported scores are the average of the individual video scores.

We evaluated our method on the validation set using the official DAVIS-2017 evaluation algorithm that involves a Hungarian matching process. Results are collected in Table 3. On this dataset, our method has a better  $\mathcal{J}\&\mathcal{F}$  score than MoSeg [3] (42.0 vs 35.8), while OCLR flow-only [2] outperforms both (55.1), but OCLR is trained using synthetic data whose generation involves human annotation.

### 3.4. Differentiation of motion patterns

Network output may be limited to three segments with  $K = 4$ , not due to the model itself but to the train set. Indeed, DAVIS2016 train set comprises too few videos with several moving objects. We have noticed in other applica-

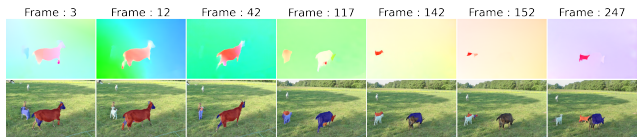

Figure 6. Different instants of "goats1" video of FBMS59. First row: input optical flow (HSV color code). Second row: motion segments predicted by the network (before applying the global temporal linkage), and superimposed on the video frame (except background mask); when static, goats are merged with background.

tions that the network, trained on a dataset involving many moving objects, is producing a number of segments equal to the specified  $K$ . Besides, we are not dealing with instance segmentation, but with motion segmentation into layers. Accordingly, objects with the same motion are prone to belong to the same mask (layer), but the decomposition into connected segments could be an easy postprocessing. On the other hand, our method manages to separate objects with different motions, e.g., two cars or two animals in Fig.3 of the main paper. In addition, results (with  $K = 4$ ) on the "goats1" video are reported in Fig.6.

#### 4. Repeatability

In order to evaluate the reliability of our method, we repeated five times the training of our model with five different initialisations and performed the abovementioned evaluation pipeline.

| Experiment | DAVIS Val | SegTrackV2 | FBMS | Davis 2017 |
|------------|-----------|------------|------|------------|
| 1          | 73.2      | 55.0       | 59.4 | 42.0       |
| 2          | 73.9      | 57.6       | 59.0 | 39.0       |
| 3          | 72.6      | 55.1       | 59.5 | 40.8       |
| 4          | 73.9      | 56.5       | 60.5 | 38.8       |
| 5          | 72.7      | 55.2       | 59.1 | 41.0       |
| Average    | 73.3      | 55.9       | 59.5 | 40.3       |

Table 4. Results ( $\mathcal{J}$  &  $\mathcal{F}$  for Davis2017-motion and Jaccard index  $\mathcal{J}$  for the three others) of five experiments, involving different initialisations of the network, on the four datasets. Reported results in the main paper correspond to experiment 1.

We can observe that the results collected in Table 4 are globally stable, whereas the process described above (segment linkage and segment selection) could generate variability.

#### 5. Latent motion representation

We give a few highlights on the latent motion representation issued from the trained network as mentioned in the main paper (Section 3.4). We carried out a preliminary experiment directly based on the normalized latent vectors of all the sites of a subsequence. The latent vectors are of dimension 32. We applied a PCA procedure to all the latent vectors over the whole subsequence of length  $T$  and taking into account the triplets at each time instant. These latent vectors are stacked as an array of dimensions  $(3 \times H \times W \times T, 32)$ , where  $H$  and  $W$  are respectively the height and the width of each frame of the subsequence.

Then, we compute the softmax of the projections onto the three first components of the PCA output. Interestingly, after thresholding the softmax values (threshold value of 0.7), we observe that the resulting map is likely to provide a binary segment close to the ground truth of the primary moving object, as illustrated in Fig.7. It shows that

our latent motion representation is not only informative in its own, but more importantly, is coherent over the subsequence since the PCA is computed once over the subsequence. In future work, we will investigate further this possibility to provide a binary segmentation directly oriented to the VOS evaluation, when our network is trained for multiple motion segmentation with  $K$  masks.

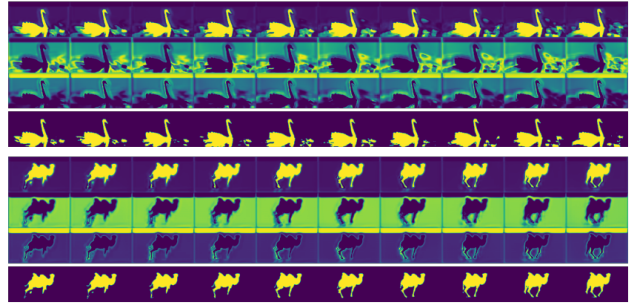

Figure 7. Illustration of the principal component analysis of the latent motion representation. Two examples from DAVIS2016: blackswan and camel. For each example, the first three rows are the projection of the latent vectors on the three first principal components. The fourth row is the binary segmentation obtained by thresholding the projection on the first component.

#### 6. Detailed results per videos of the datasets

Hereafter, we report detailed results through tables collecting the evaluation scores obtained by our method for every video of the four datasets, DAVIS2016, SegTrackV2, FBMS59, and DAVIS2017-motion. Let us recall that the official evaluation algorithm is not the same for DAVIS2016 and DAVIS2017. The evaluation is done in one go on the whole video for DAVIS2017, while it is achieved frame by frame of the video for DAVIS2016.

### 6.1. DAVIS2016

| Video              | $\mathcal{J}$ (M) | $\mathcal{J}$ (O) | $\mathcal{J}$ (D) | $\mathcal{F}$ (M) | $\mathcal{F}$ (O) | $\mathcal{F}$ (D) |
|--------------------|-------------------|-------------------|-------------------|-------------------|-------------------|-------------------|
| blackswan          | 0.584             | 0.833             | -0.11             | 0.594             | 0.875             | -0.072            |
| bmx-trees          | 0.597             | 0.756             | 0.198             | 0.798             | 0.949             | 0.095             |
| breakdance         | 0.738             | 0.976             | 0.004             | 0.738             | 0.988             | -0.007            |
| camel              | 0.871             | 1                 | 0.12              | 0.859             | 1                 | 0.128             |
| car-roundabout     | 0.918             | 1                 | -0.026            | 0.828             | 1                 | -0.068            |
| car-shadow         | 0.897             | 1                 | 0.019             | 0.846             | 1                 | -0.011            |
| cows               | 0.873             | 1                 | 0.031             | 0.804             | 1                 | 0.022             |
| dance-twirl        | 0.821             | 1                 | -0.071            | 0.853             | 1                 | -0.022            |
| dog                | 0.812             | 1                 | -0.044            | 0.709             | 0.931             | -0.024            |
| drift-chicane      | 0.664             | 0.8               | -0.221            | 0.754             | 0.84              | -0.069            |
| drift-straight     | 0.861             | 1                 | 0.046             | 0.786             | 0.938             | 0.245             |
| goat               | 0.298             | 0                 | 0.125             | 0.299             | 0.023             | 0.037             |
| horsejump-high     | 0.821             | 1                 | 0.097             | 0.87              | 1                 | 0.044             |
| kite-surf          | 0.424             | 0.354             | 0.249             | 0.41              | 0.208             | 0.087             |
| libby              | 0.734             | 0.979             | 0.117             | 0.846             | 1                 | -0.002            |
| motocross-jump     | 0.61              | 0.553             | 0.182             | 0.377             | 0.474             | 0.198             |
| paragliding-launch | 0.624             | 0.667             | 0.313             | 0.314             | 0.167             | 0.375             |
| parkour            | 0.735             | 0.959             | 0.069             | 0.777             | 1                 | 0.15              |
| scooter-black      | 0.861             | 1                 | -0.023            | 0.739             | 1                 | 0.106             |
| soapbox            | 0.889             | 1                 | 0.03              | 0.859             | 1                 | 0.021             |
| Average            | 0.732             | 0.844             | 0.055             | 0.703             | 0.82              | 0.062             |

Table 5. Results given for every video of DAVIS2016 dataset. Reported scores per video are the average Jaccard score over frames in the video. The very last row is the average over videos scores.  $\mathcal{J}$  is the Jaccard index and  $\mathcal{F}$  is the Countour Accuracy. The Mean ( $M$ ) is the average of the scores, the Recall ( $O$ ) is the fraction of frames per video with a score higher than 0.5, and the Decay ( $D$ ) is the degradation of the score over time in the video.

### 6.2. SegTrackV2

| Video            | Jacc ( $\mathcal{J}$ ) |
|------------------|------------------------|
| Bird of paradise | 51.5                   |
| birdfall         | 38.1                   |
| bmx              | 76.9                   |
| cheetah          | 44.1                   |
| drift            | 33.0                   |
| frog             | 78.2                   |
| girl             | 59.8                   |
| hummingbird      | 68.7                   |
| monkey           | 53.9                   |
| monkeydog        | 16.6                   |
| parachute        | 92.9                   |
| penguin          | 39.4                   |
| soldier          | 64.0                   |
| worm             | 39.3                   |
| Frames. Avg      | 55.0                   |

Table 6. Results given for every video of SegTrackV2 dataset. Each reported score is the average Jaccard score over annotated frames in the video. The very last row is the average over all the frames and over all the videos.

### 6.3. FBMS59

| Video        | Jacc ( $\mathcal{J}$ ) |
|--------------|------------------------|
| camel01      | 27.8                   |
| cars1        | 88.1                   |
| cars10       | 54.1                   |
| cars4        | 83.6                   |
| cars5        | 83.7                   |
| cats01       | 71.1                   |
| cats03       | 79.9                   |
| cats06       | 38.9                   |
| dogs01       | 73.1                   |
| dogs02       | 66.1                   |
| farm01       | 79.1                   |
| giraffes01   | 36.2                   |
| goats01      | 45.5                   |
| horses02     | 65.3                   |
| horses04     | 72.4                   |
| horses05     | 43.9                   |
| lion01       | 50.7                   |
| marple12     | 61.3                   |
| marple2      | 64.3                   |
| marple4      | 77.8                   |
| marple6      | 51.0                   |
| marple7      | 58.0                   |
| marple9      | 66.8                   |
| people03     | 52.8                   |
| people1      | 80.1                   |
| people2      | 87.3                   |
| rabbits02    | 49.8                   |
| rabbits03    | 41.3                   |
| rabbits04    | 50.2                   |
| tennis       | 72.6                   |
| Frames. Avg. | 59.4                   |

Table 7. Results given for every video of FBMS59 dataset. Each reported score is the average Jaccard score over annotated frames in the video. The very last row is the average over all the annotated frames and over all the videos.

## 6.4. DAVIS2017-motion

| Sequence             | J-Mean | F-Mean |
|----------------------|--------|--------|
| bike-packing_1       | 0.072  | 0.370  |
| bike-packing_2       | 0.276  | 0.393  |
| blackswan_1          | 0.577  | 0.593  |
| bmw-trees_1          | 0.520  | 0.766  |
| breakdance_1         | 0.365  | 0.558  |
| camel_1              | 0.716  | 0.683  |
| car-roundabout_1     | 0.900  | 0.814  |
| car-shadow_1         | 0.870  | 0.804  |
| cows_1               | 0.778  | 0.675  |
| dance-twirl_1        | 0.441  | 0.641  |
| dog_1                | 0.481  | 0.456  |
| dogs-jump_1          | 0.433  | 0.506  |
| dogs-jump_2          | 0.018  | 0.174  |
| dogs-jump_3          | 0.190  | 0.251  |
| drift-chicane_1      | 0.381  | 0.562  |
| drift-straight_1     | 0.811  | 0.739  |
| goat_1               | 0.275  | 0.303  |
| gold-fish_1          | 0.175  | 0.270  |
| gold-fish_2          | 0.027  | 0.325  |
| gold-fish_3          | 0.168  | 0.209  |
| gold-fish_4          | 0.000  | 0.000  |
| gold-fish_5          | 0.000  | 0.000  |
| horsejump-high_1     | 0.562  | 0.783  |
| india_1              | 0.057  | 0.066  |
| india_2              | 0.047  | 0.110  |
| india_3              | 0.143  | 0.186  |
| judo_1               | 0.247  | 0.357  |
| judo_2               | 0.417  | 0.522  |
| kite-surf_1          | 0.422  | 0.418  |
| lab-coat_1           | 0.337  | 0.313  |
| libby_1              | 0.730  | 0.847  |
| loading_1            | 0.166  | 0.226  |
| loading_2            | 0.068  | 0.210  |
| loading_3            | 0.407  | 0.416  |
| mbike-trick_1        | 0.644  | 0.683  |
| motocross-jump_1     | 0.509  | 0.481  |
| paragliding-launch_1 | 0.339  | 0.237  |
| parkour_1            | 0.682  | 0.753  |
| pigs_1               | 0.253  | 0.394  |
| pigs_2               | 0.019  | 0.313  |
| pigs_3               | 0.369  | 0.432  |
| scooter-black_1      | 0.856  | 0.750  |
| shooting_1           | 0.575  | 0.500  |
| soapbox_1            | 0.726  | 0.779  |

| J&FMean | JMean | JRecall | JDecay | FMean | FRecall | FDecay |
|---------|-------|---------|--------|-------|---------|--------|
| 0.420   | 0.388 | 0.365   | 0.006  | 0.452 | 0.454   | 0.039  |

Table 8. Results given for every video of DAVIS2017-motion dataset. The very last row is the average score over all the videos for the different criteria.

## References

- [1] J. Pont-Tuset, F. Perazzi, S. Caelles, P. Arbeláez, A. Sorkine-Hornung, and L. Van Gool. The 2017 Davis challenge on video object segmentation. *arXiv:1704.00675*, 2017.
- [2] J. Xie, W. Xie, and A. Zisserman. Segmenting moving objects via an object-centric layered representation. In *Conference on Neural Information Processing Systems (NeurIPS)*, 2022.
- [3] C. Yang, H. Lamdouar, E. Lu, A. Zisserman, and W. Xie. Self-supervised video object segmentation by motion grouping. In *International Conference on Computer Vision (ICCV)*, October 2021.
